# Supplementary material
Source: Frontiers journal article supplement (https://www.frontiersin.org/articles/461455)

A

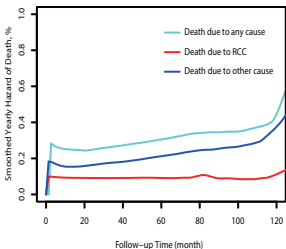

B

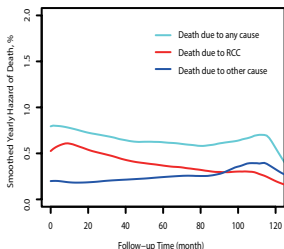

C

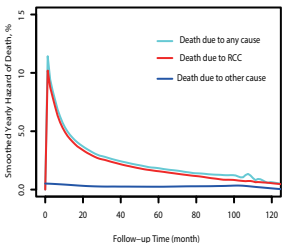

D

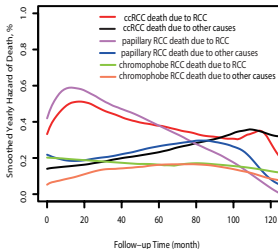

Supplement: Image_1.pdf [file Image_1.pdf]
